# Supplementary material
Source: PubMed Central journal article supplement (PMC3024751)
Supplement: supp_M110.149153_jbc.M110.149153-1.pdf [file supp_M110.149153_jbc.M110.149153-1.pdf]

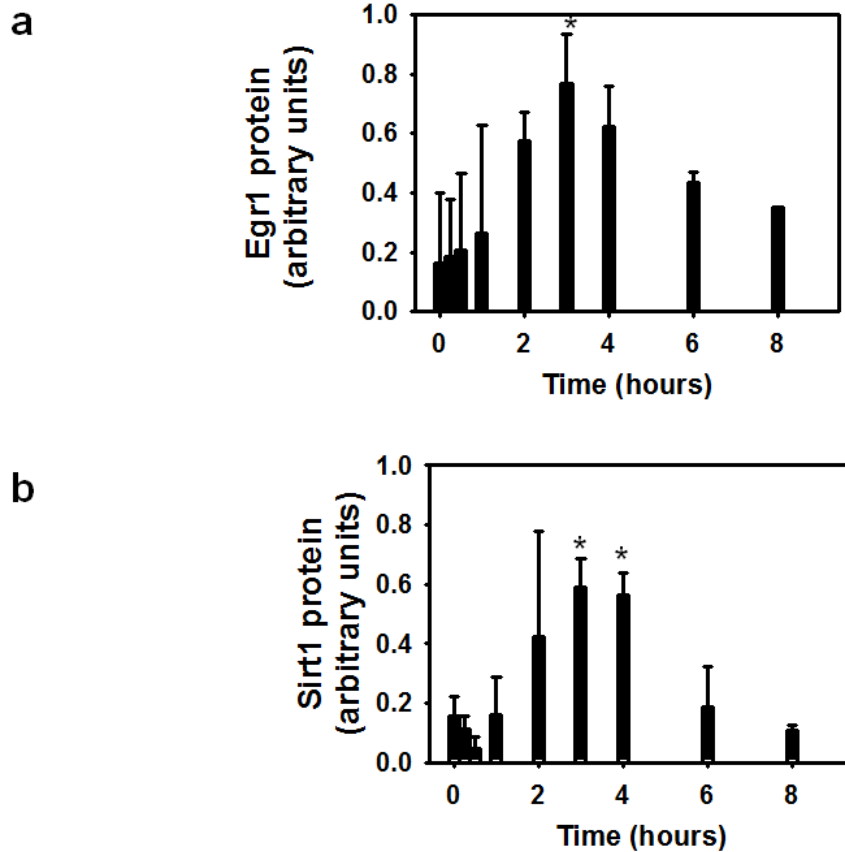

Supplementary data

Figure 1: Egr1 and Sirt1 protein expression in myotubes subjected to stretch.

C<sub>2</sub>C<sub>1</sub><sub>2</sub> myotubes grown on flexible bottomed plates were stretched for 30 min and collected before stretch and at the indicated times after stretch. Whole protein was extracted and subjected to SDS-PAGE. Western blots were analyzed with Egr1, Sirt1 and tubulin antibodies. The corresponding bands were quantified by densitometry and the ratios for Egr1/tubulin (a) and Sirt1/tubulin (b) were calculated. Plotted values represent averages from three independent experiments. Overall statistical difference among groups was evaluated by ANOVA (P=0.011 and P<0.001 for Egr1 and Sirt1, respectively). Asterisks indicate statistical significant difference as evaluated by pairwise comparison to the mean value of non-stretched myotubes by Holman-Sidak method.
